# Supplementary material for: Using Attribution Sequence Alignment to Interpret Deep Learning Models for Mirna Binding Site Prediction
Source: Preprints.org preprint supplement (doi:10.20944/preprints202212.0350.v1), 2022-12-20
Supplement: Supplementary file 2 [file supplementary]

**Table S2:** Manually extracted values from Figure 1C from Brennecke et al., 2005. The “mean” columns contain the values of bars, the “low” columns values of the low ends of error bars, and the “high” columns values of the high ends of error bars.

| <b>Mismatch position</b> | <b>miR7 low</b> | <b>miR7 mean</b> | <b>miR7 high</b> | <b>miR278 low</b> | <b>miR278 mean</b> | <b>miR278 high</b> |
|--------------------------|-----------------|------------------|------------------|-------------------|--------------------|--------------------|
| 0                        | 8.4             | 12.5             | 16.6             | 9.3               | 10                 | 10.5               |
| 1                        | 6.8             | 9.8              | 12.5             | 8.1               | 13.4               | 19                 |
| 2                        | 77.5            | 80               | 82.8             | 25.9              | 36.1               | 46.7               |
| 3                        | 90.1            | 93.4             | 95.9             | 37.8              | 52.8               | 67.4               |
| 4                        | 64.9            | 68.7             | 71.9             | 51.9              | 56.6               | 61.3               |
| 5                        | 66.2            | 68.2             | 69.8             | 33.6              | 47.4               | 60.8               |
| 6                        | 85.3            | 88.5             | 91.4             | 66.2              | 73.5               | 81.2               |
| 7                        | 70.3            | 74.2             | 78.8             | 24.7              | 51.2               | 77.2               |
| 8                        | 57.6            | 64.2             | 71.1             | 10.5              | 15.7               | 21.1               |
| 9                        | 15.4            | 16.5             | 17.8             | 5.5               | 13.4               | 21.1               |
| 10                       | 29.5            | 31.7             | 34               | 0                 | 0                  | 0                  |
| 3'                       | 29.5            | 32.4             | 34.9             | 21.1              | 26.7               | 32.4               |
