# Supplementary material for: Using Attribution Sequence Alignment to Interpret Deep Learning Models for Mirna Binding Site Prediction
Source: Preprints.org preprint supplement (doi:10.20944/preprints202212.0350.v1), 2022-12-20
Supplement: Supplementary file 3 [file supplementary]

Archive with 5 entries (5 files):
- figS1_variation.png
- figS3_closeness_analysis.png
- figS4_alignment_comparison.png
- TableS2.pdf
- Using attribution sequence alignment to interpret Deep Learning models for miRNA binding site prediction.pdf
