# Supplementary figures and images for: Using Attribution Sequence Alignment to Interpret Deep Learning Models for Mirna Binding Site Prediction
Source: Preprints.org preprint supplement (doi:10.20944/preprints202212.0350.v1), 2022-12-20

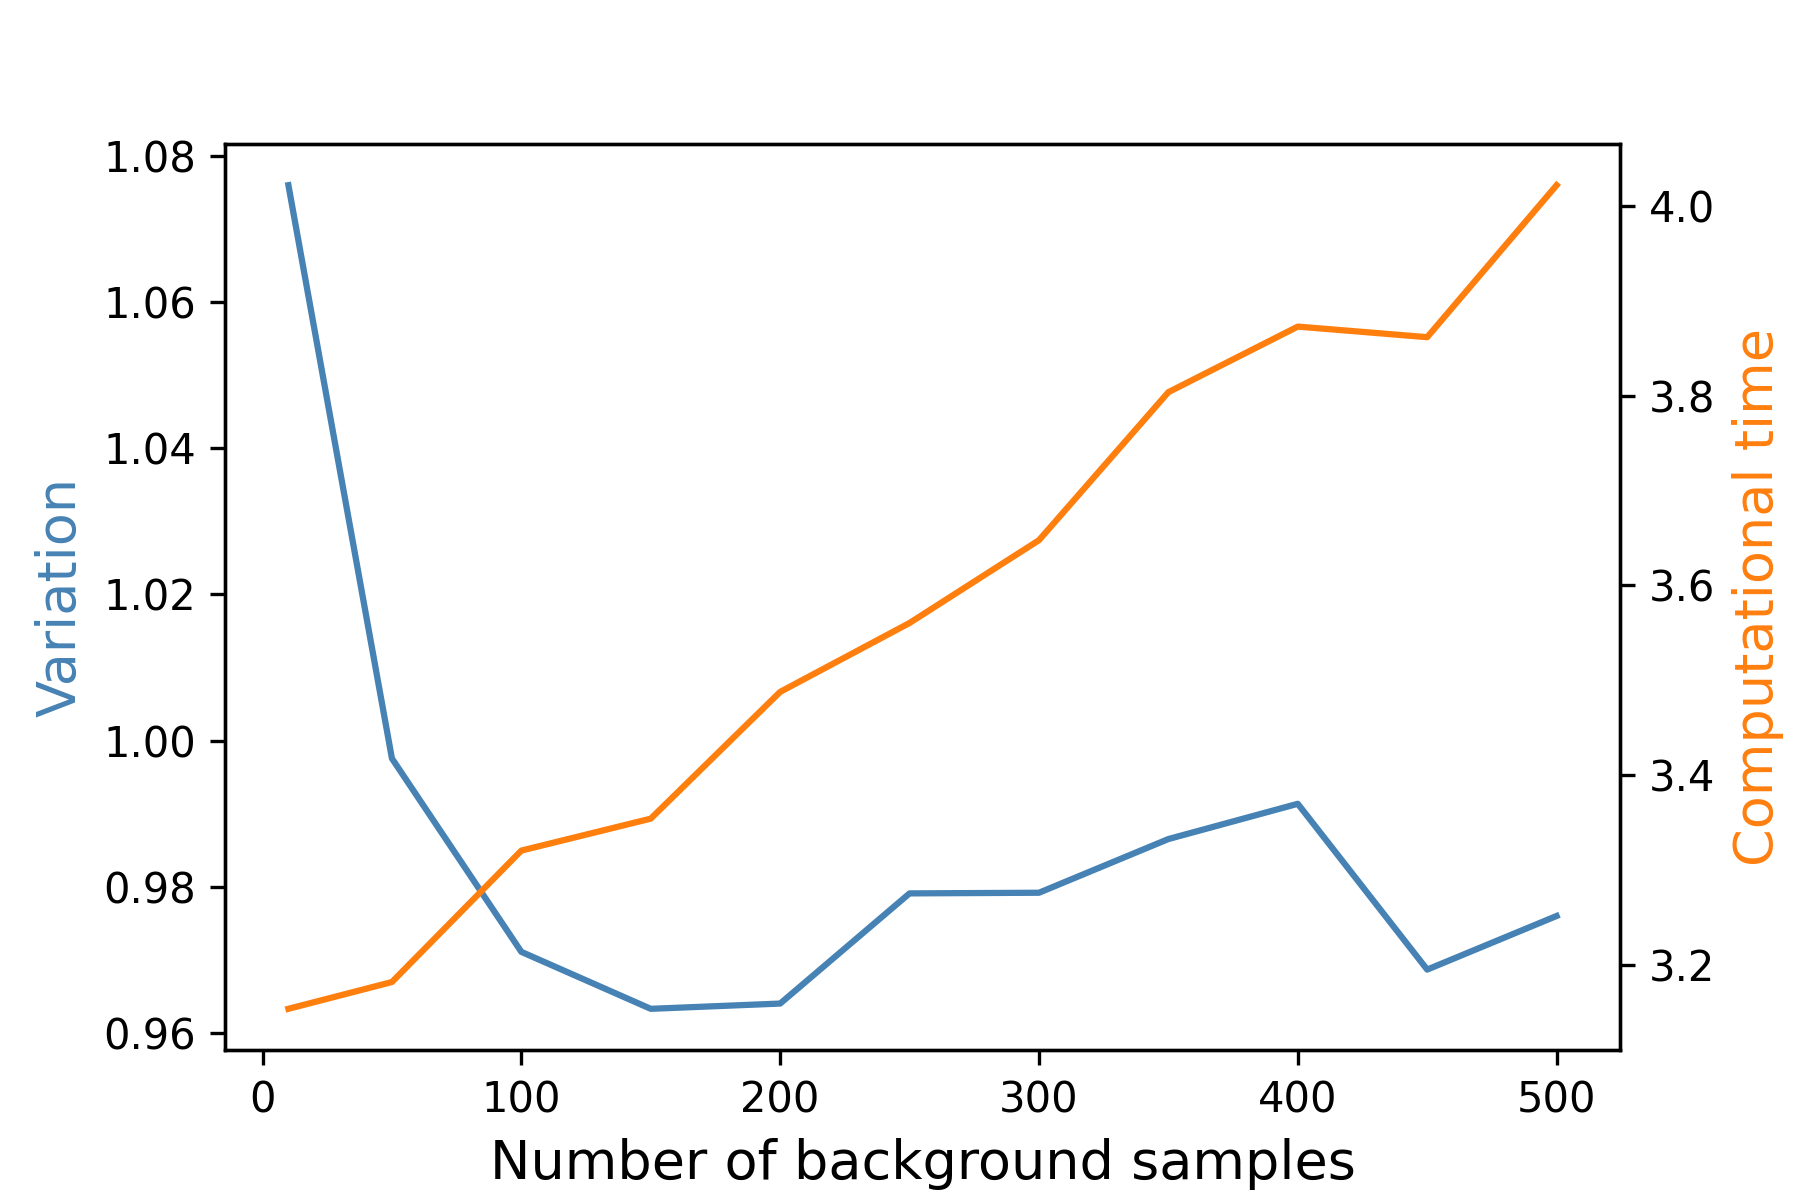

Supplement: Supplementary file 3 [file supplementary › figS1_variation.png]

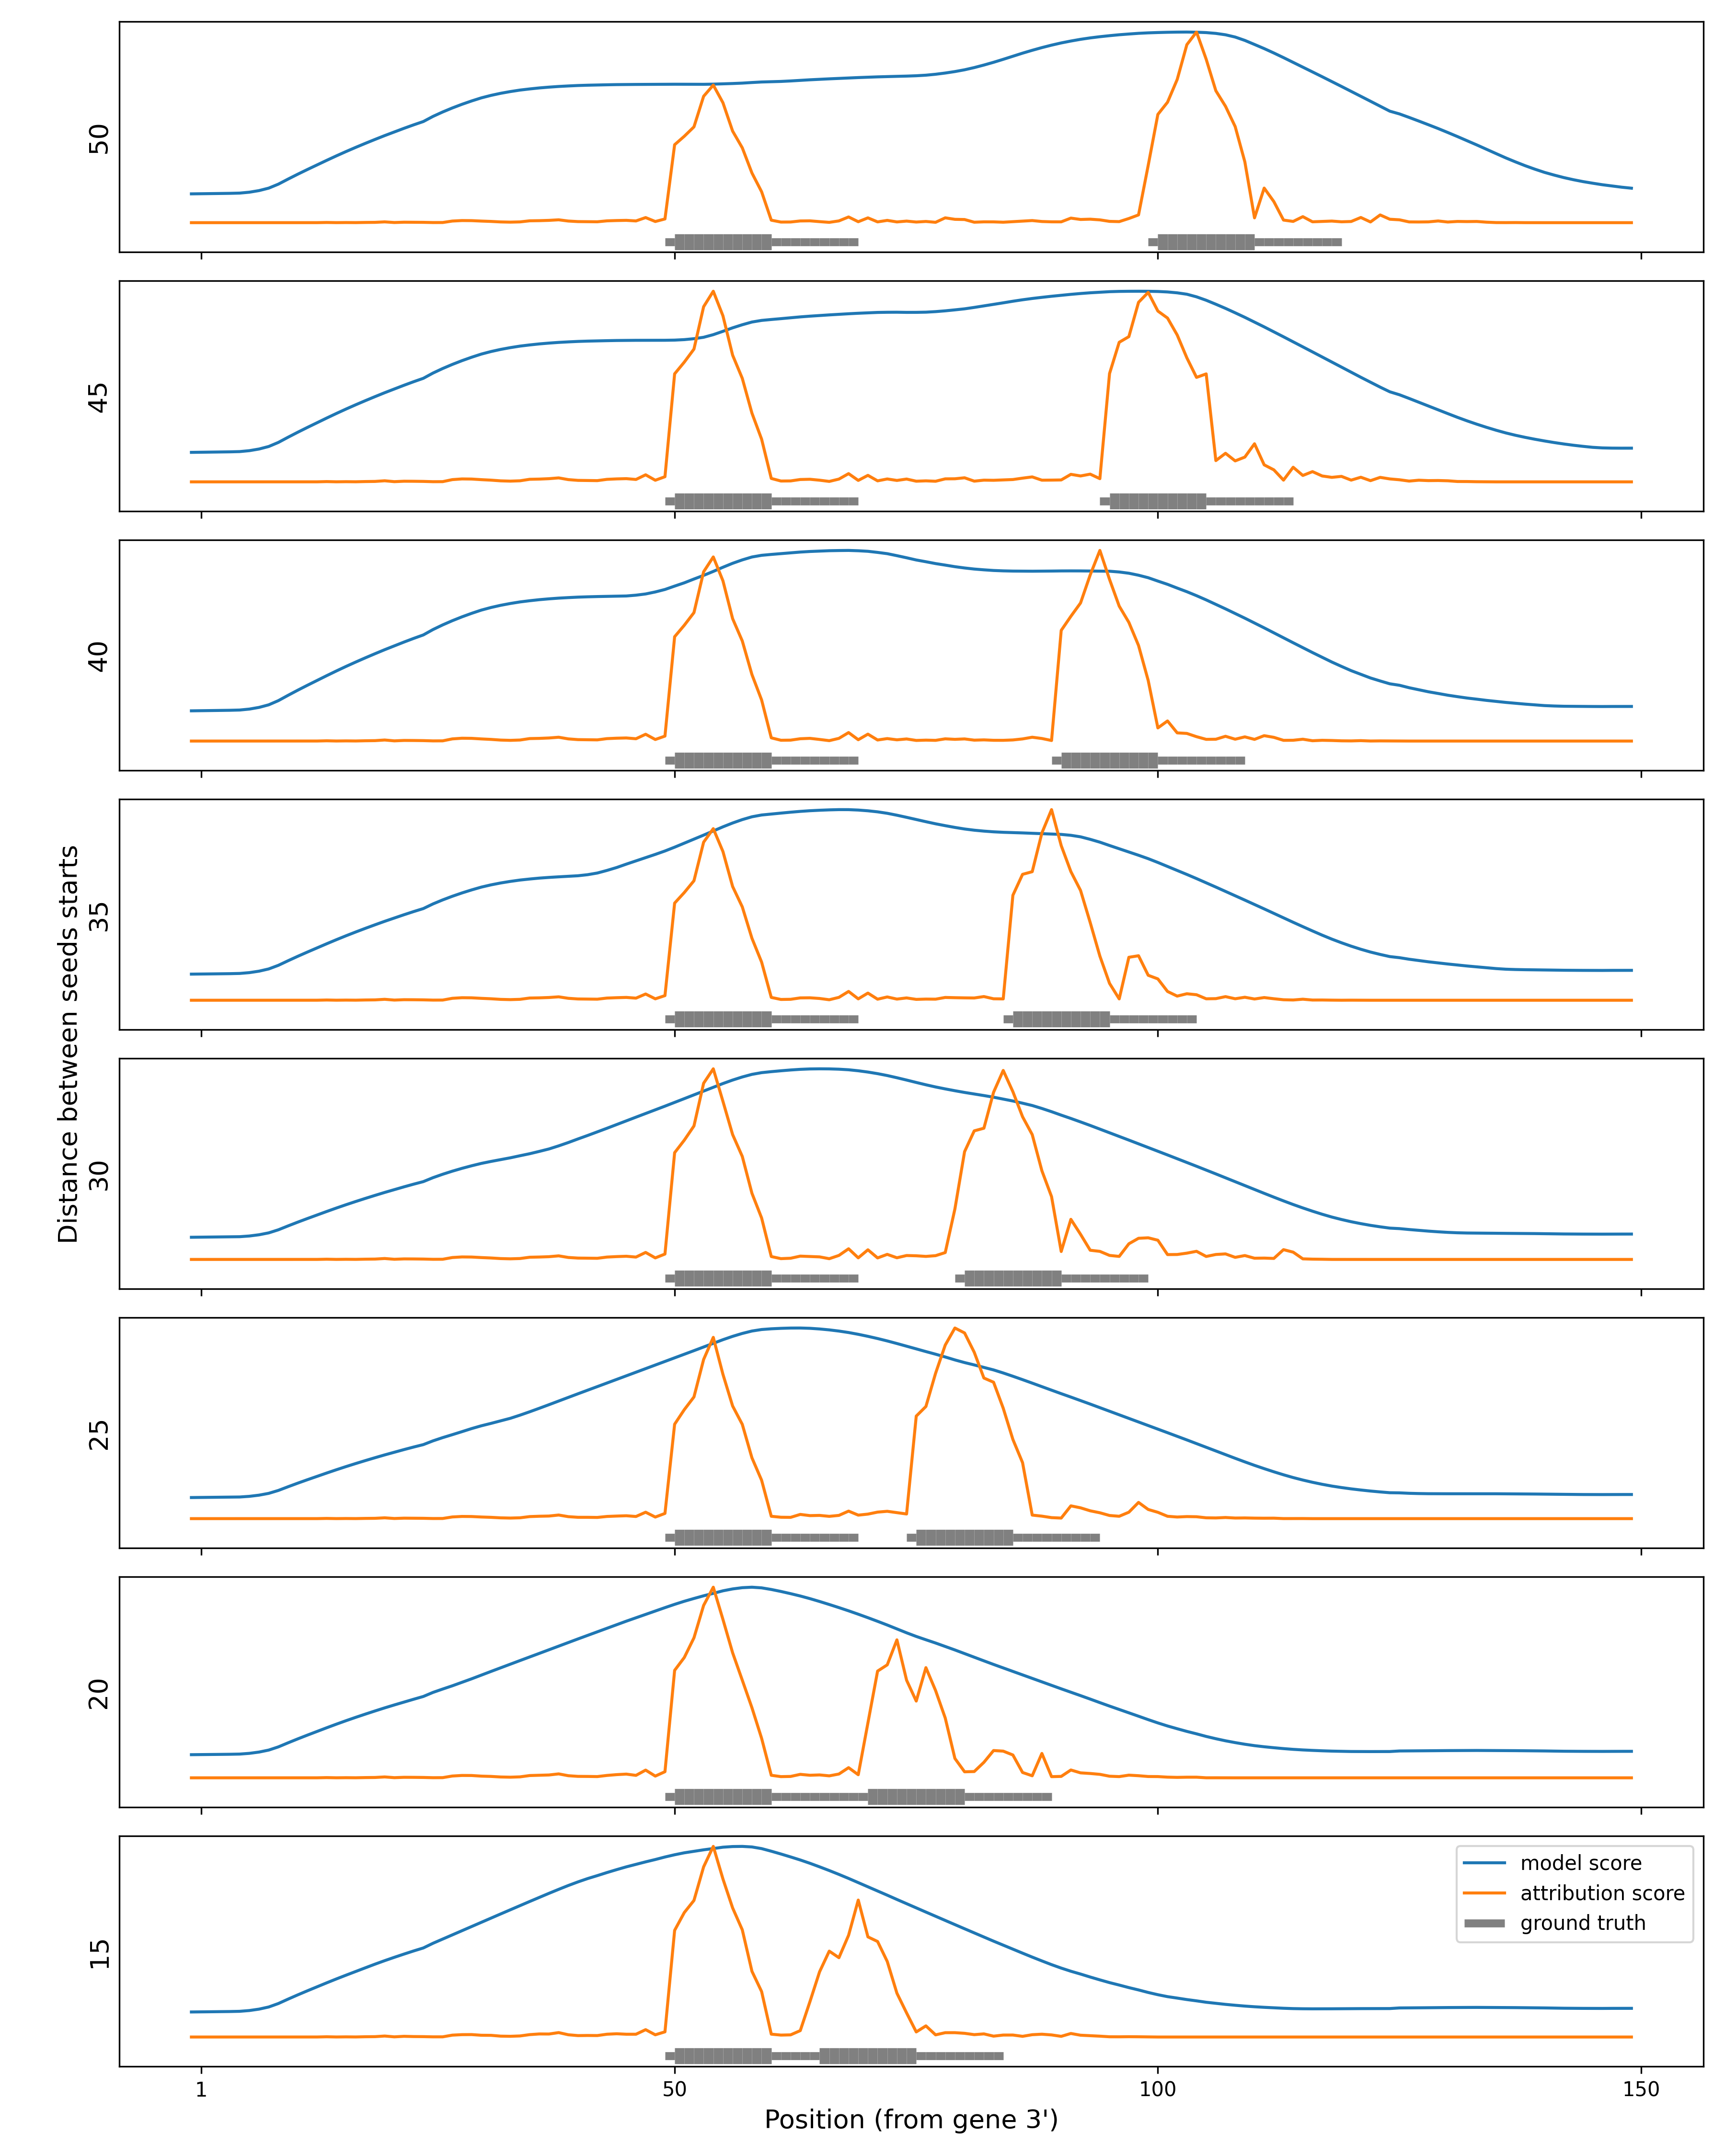

Supplement: Supplementary file 3 [file supplementary › figS3_closeness_analysis.png]

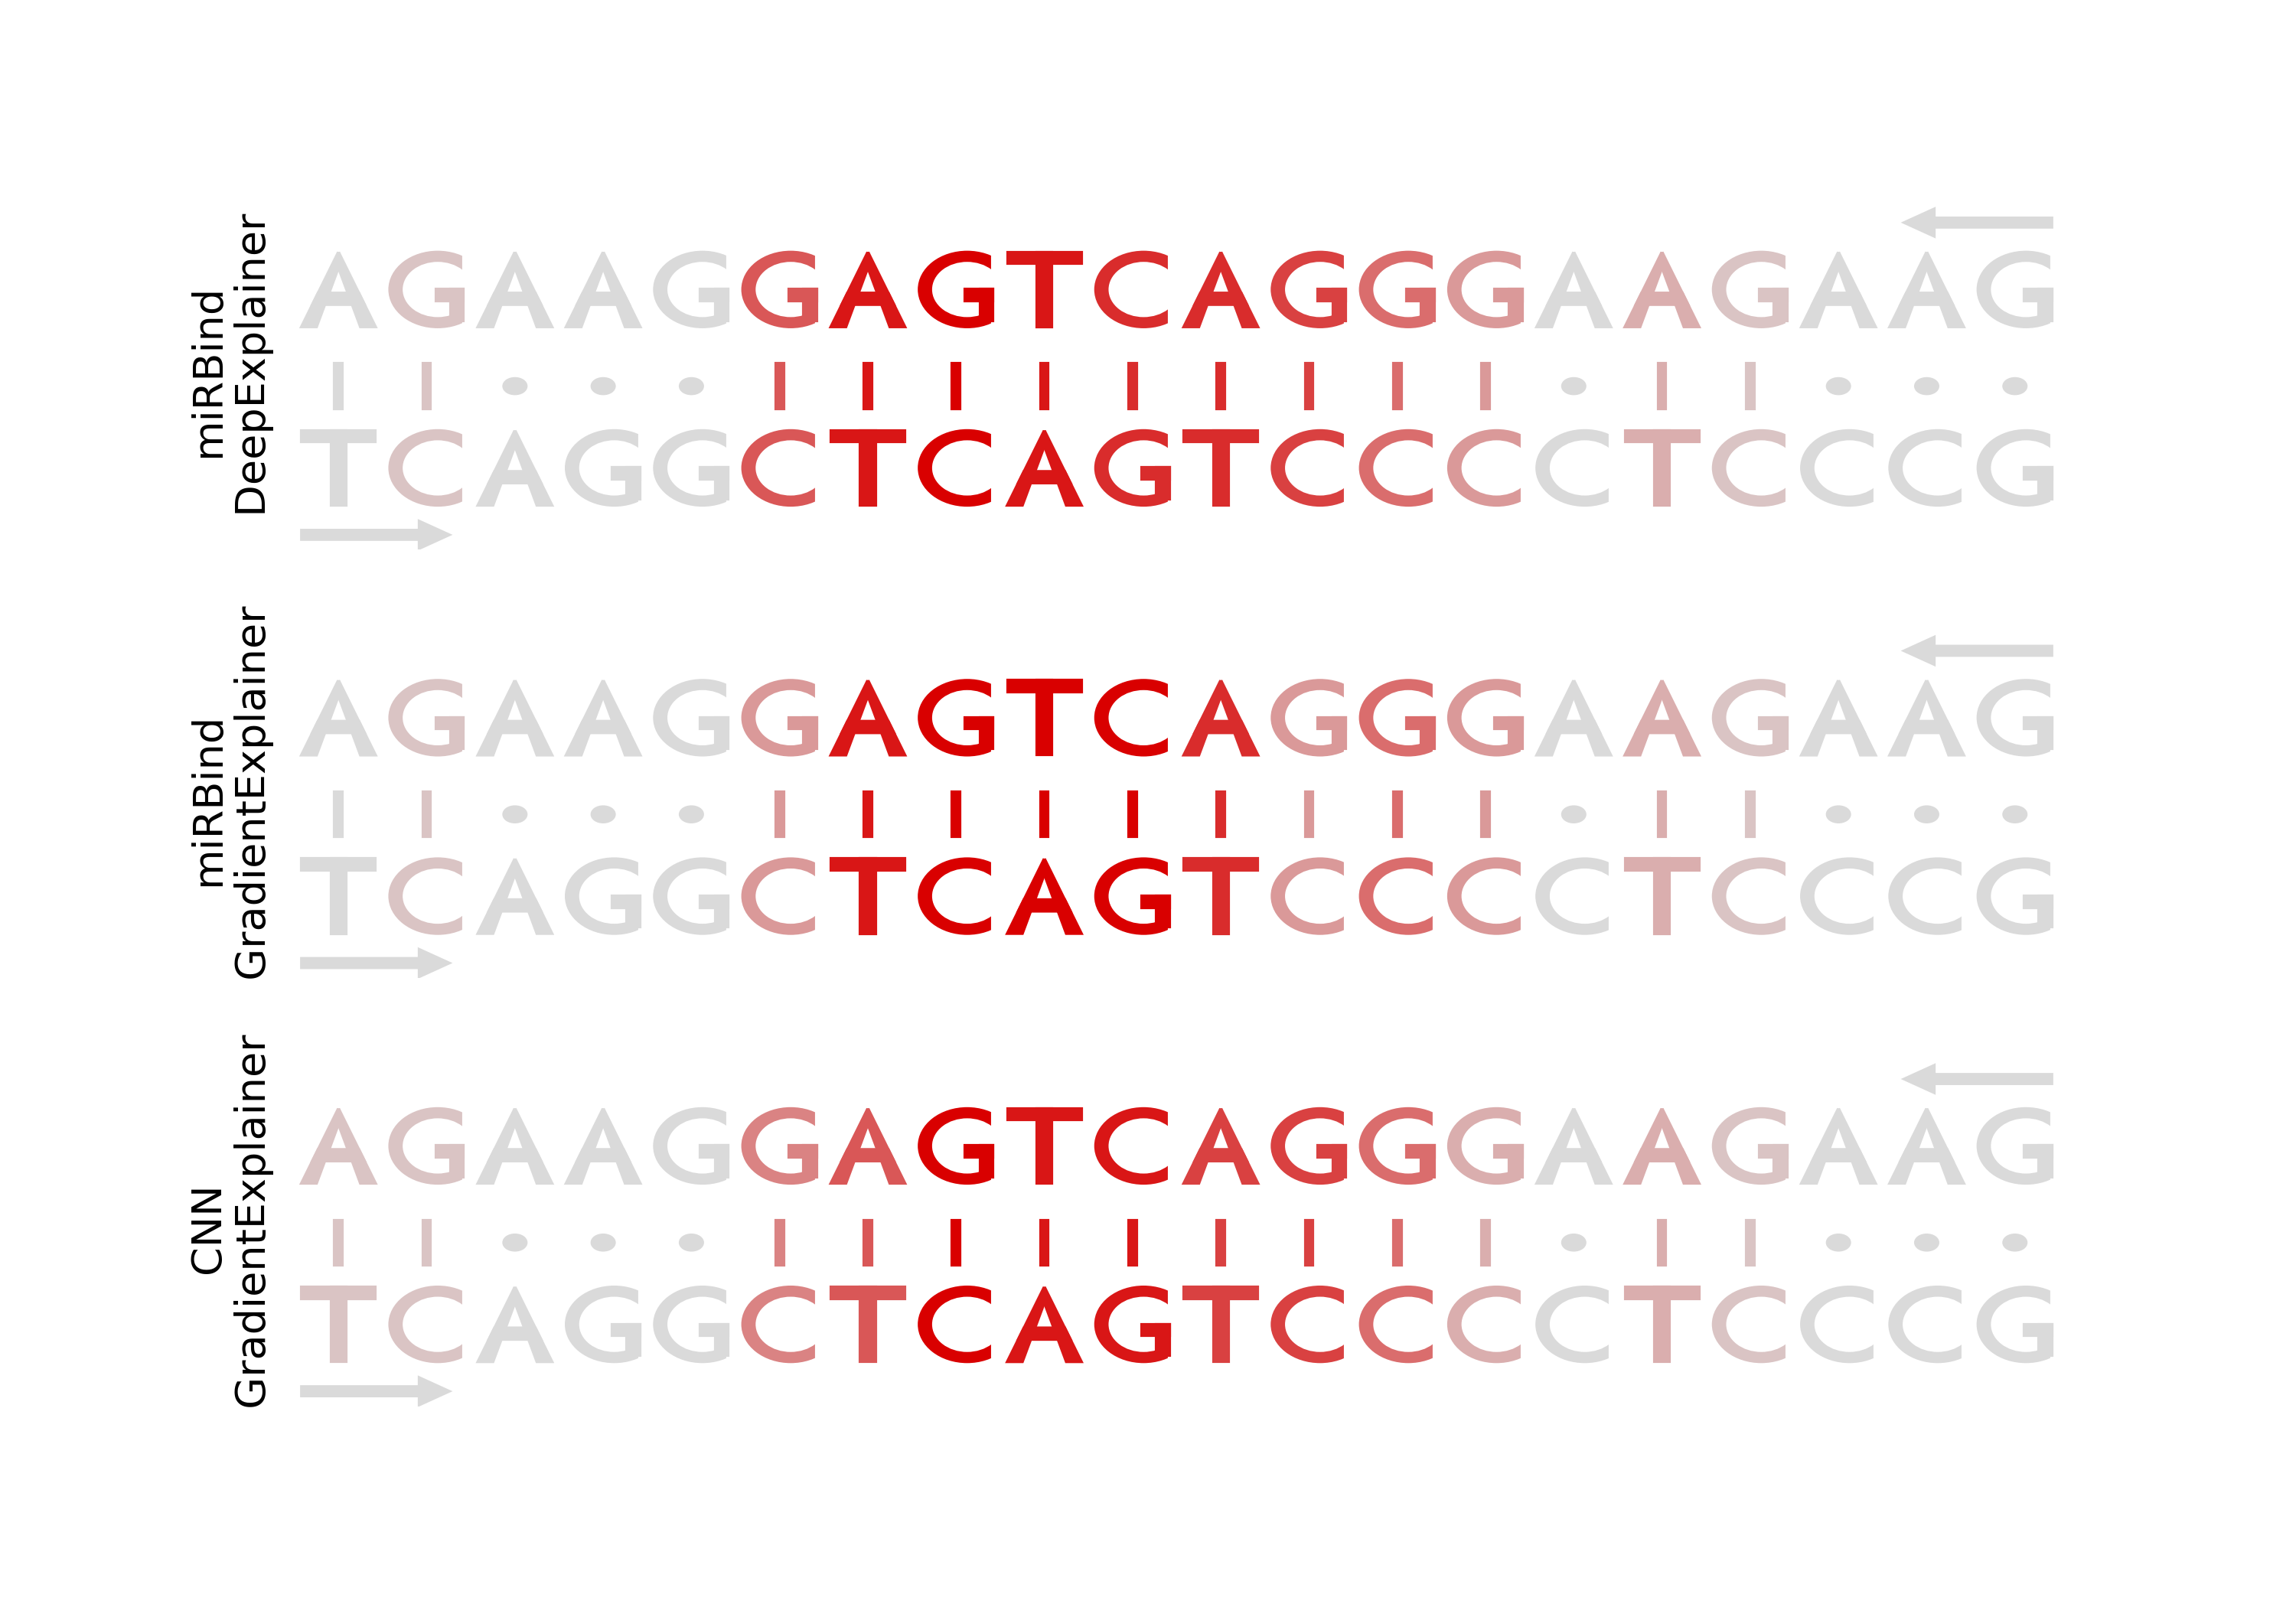

Supplement: Supplementary file 3 [file supplementary › figS4_alignment_comparison.png]
